# Supplementary material for: Targeted Clinical Metabolite Profiling Platform for the Stratification of Diabetic Patients
Source: PubMed Central journal article supplement (PMC6780060; doi:10.3390/metabo9090184), 2019-09-14
Supplement: metabolites-09-00184-s001.pdf [file metabolites-09-00184-s001.pdf]

# **Targeted Clinical Metabolomics Platform for the Stratification of Diabetic Patients**

Linda Ahonen et al.

*Supplemental Material*

## Supplemental Methods

**Figure S1A.** Structures of compounds of interest, amino acids and amino acid related compounds.

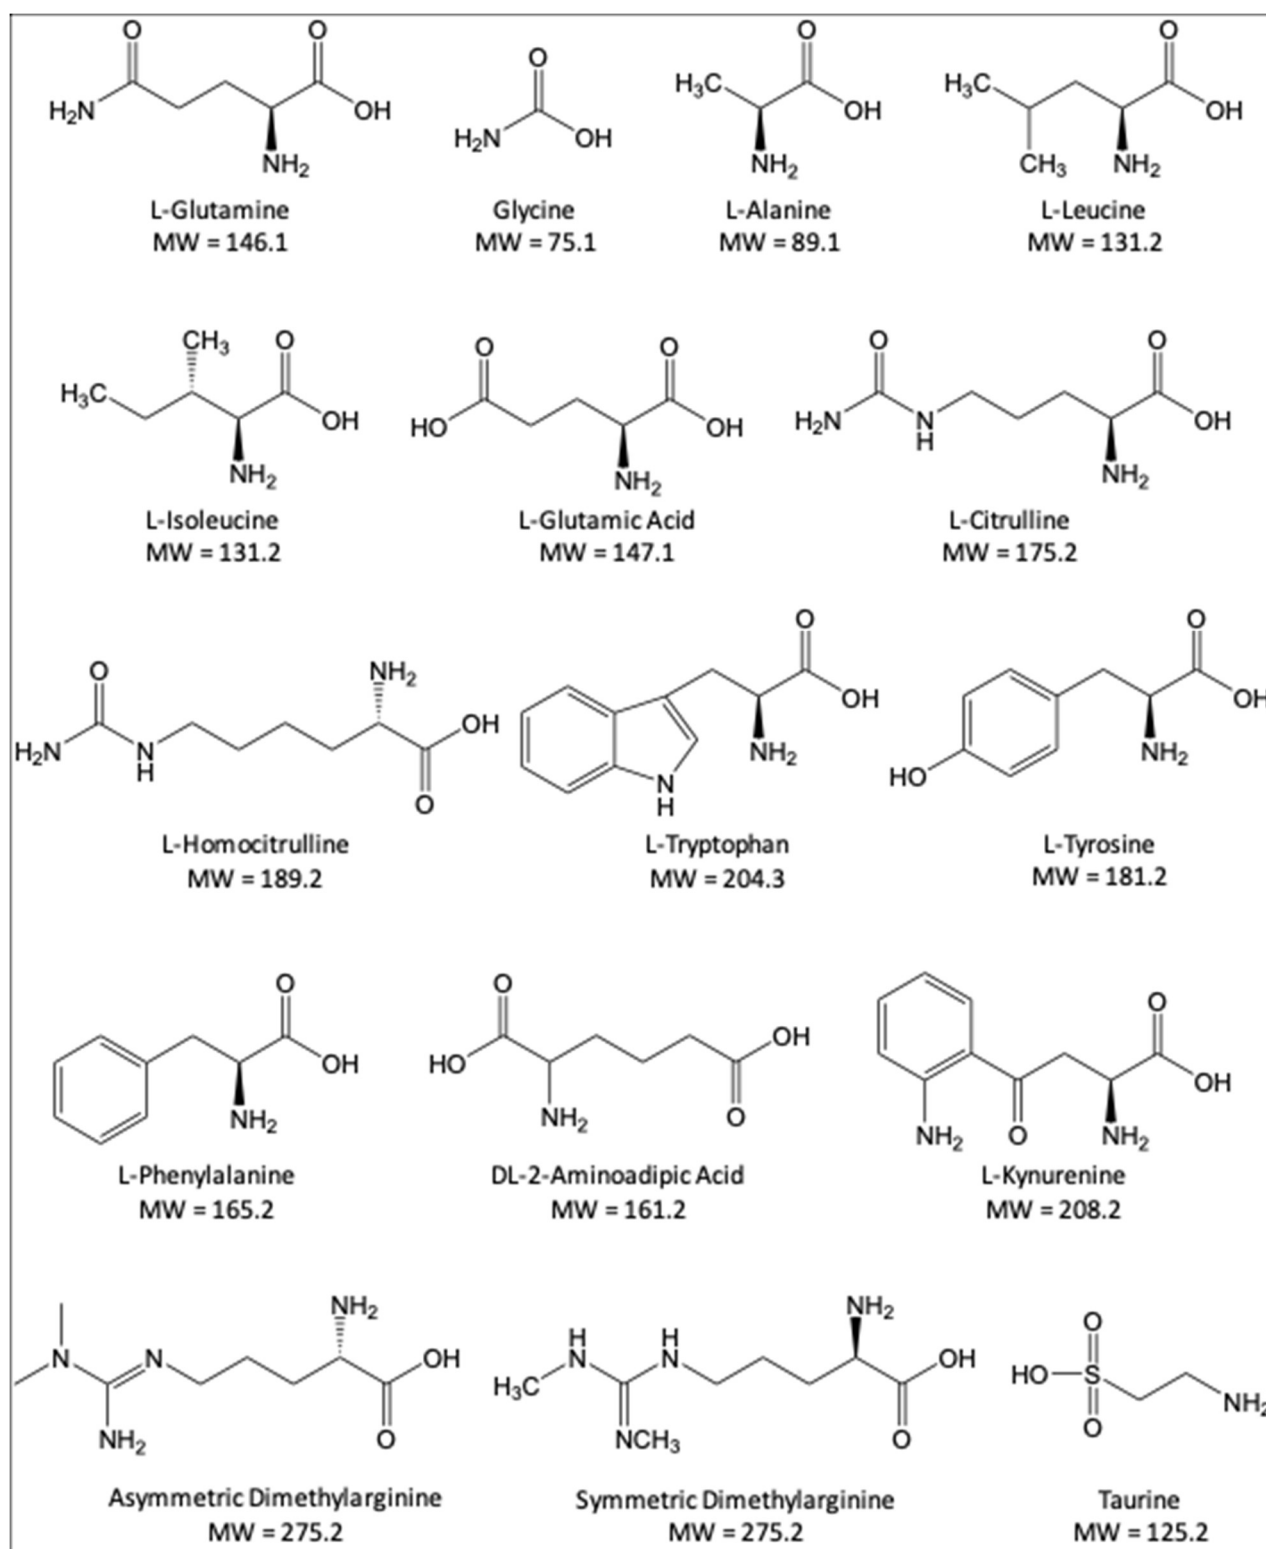

**Figure S2.** Structures of compounds of interest, bile acids.

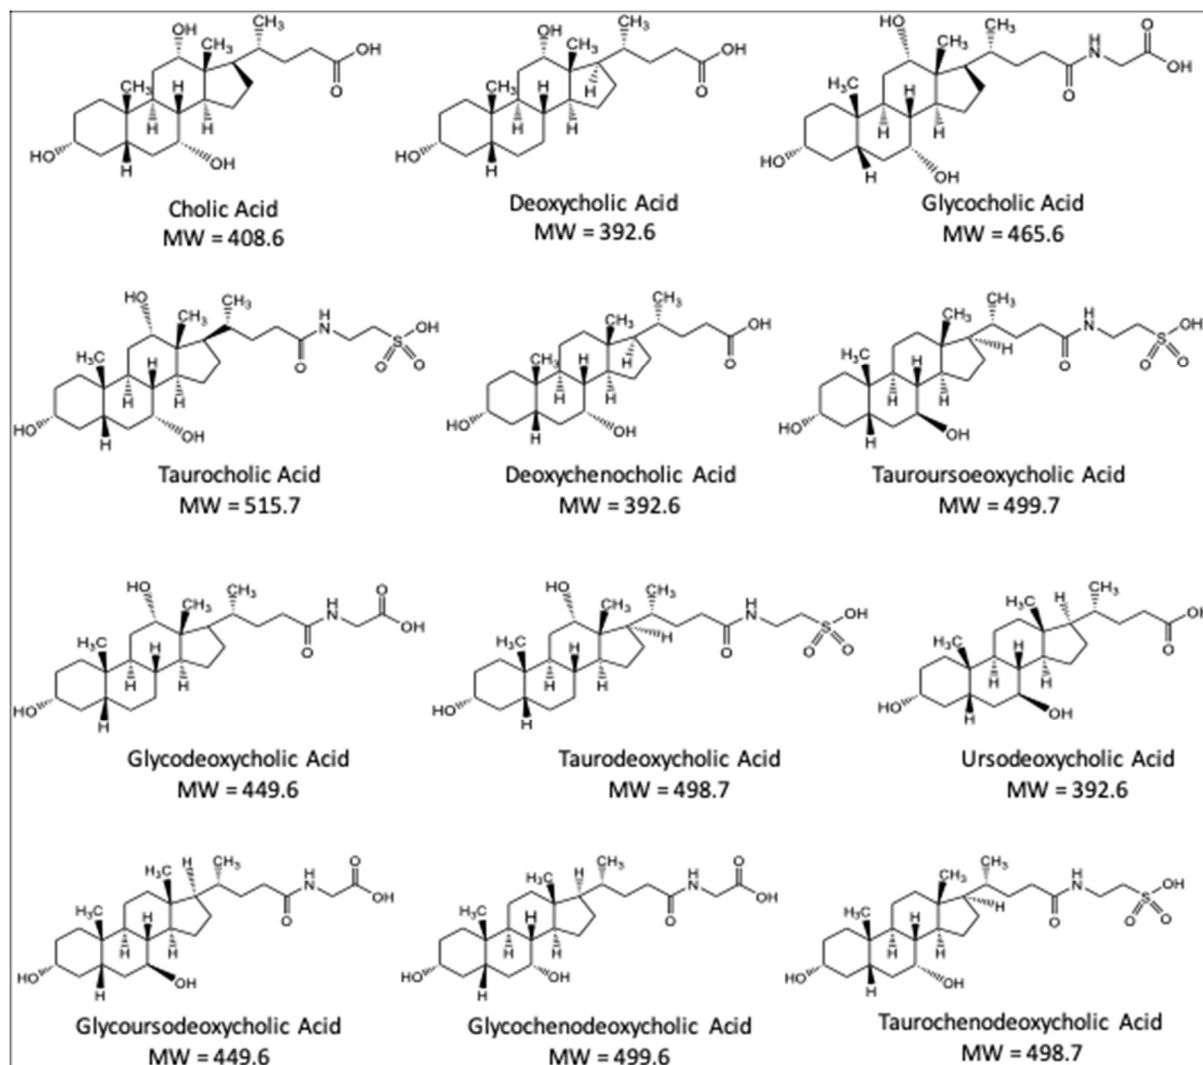

**Figure S3.** Structures of compounds of interest, small organic acids and other metabolites of interest.

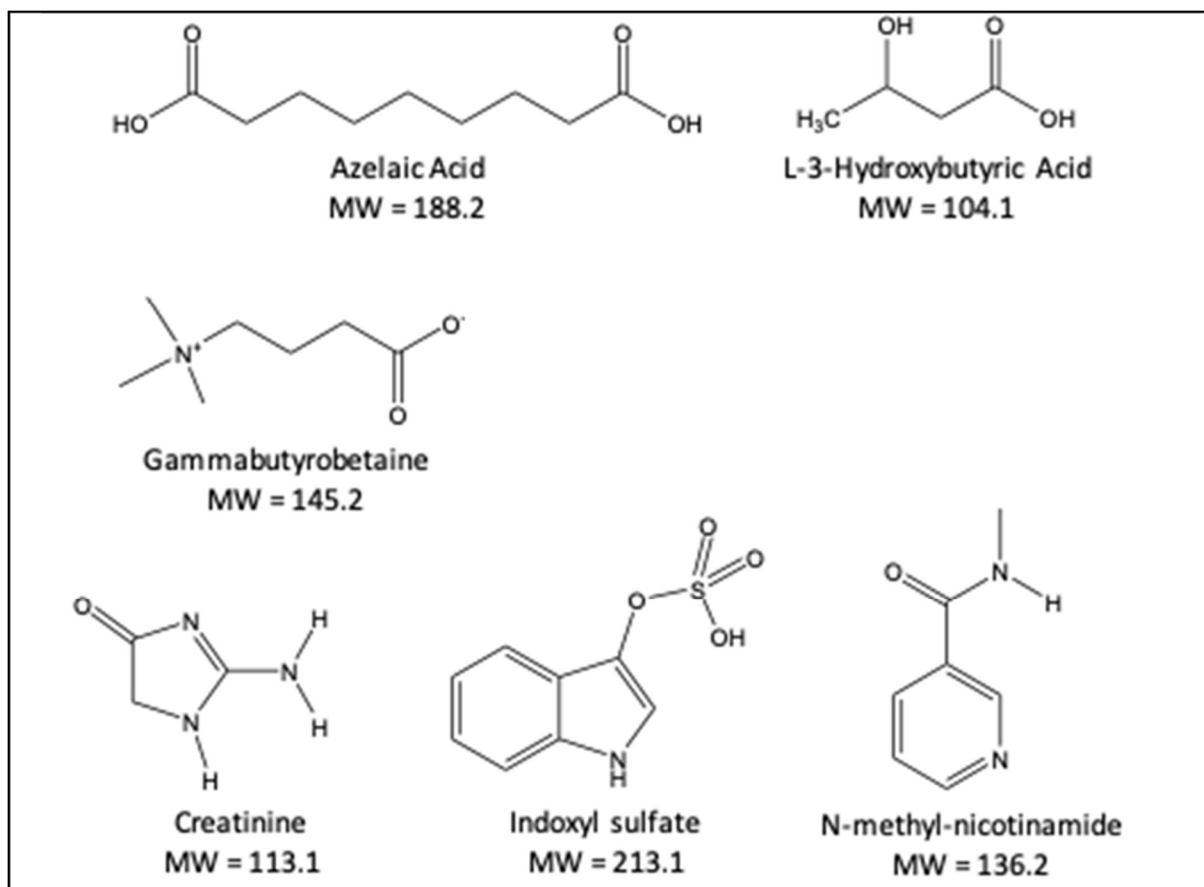

**Figure S4.** Derivatization reaction.

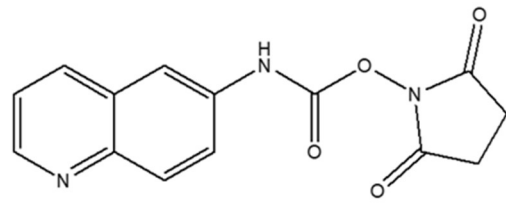

AQC reagent

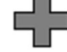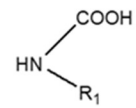

Amino acid

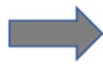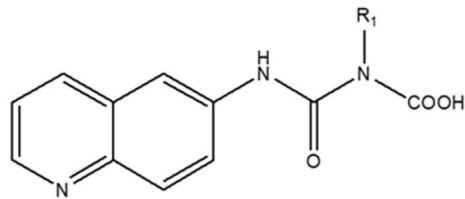

Derivatized amino acid

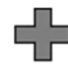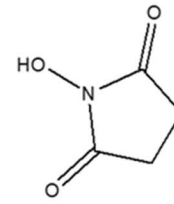

*N*-hydroxysuccinimide

Figure S5. a) MS-spectrum and b) MS/MS-spectrum of Taurine.

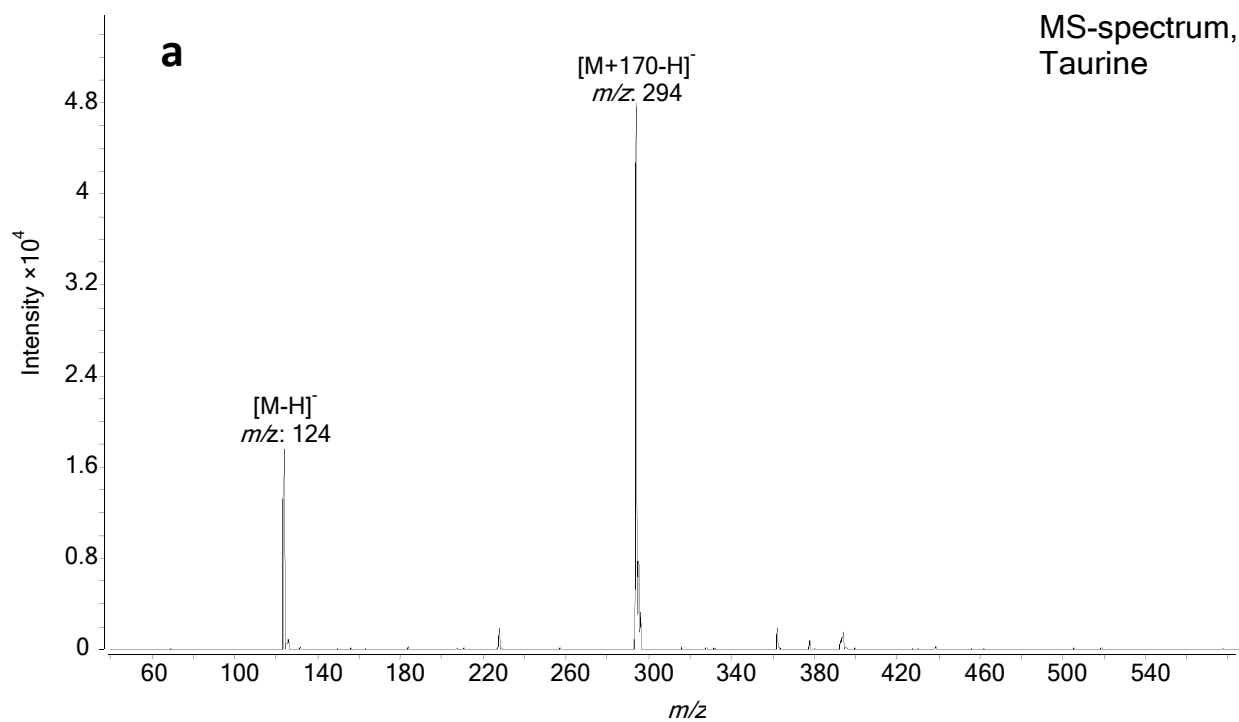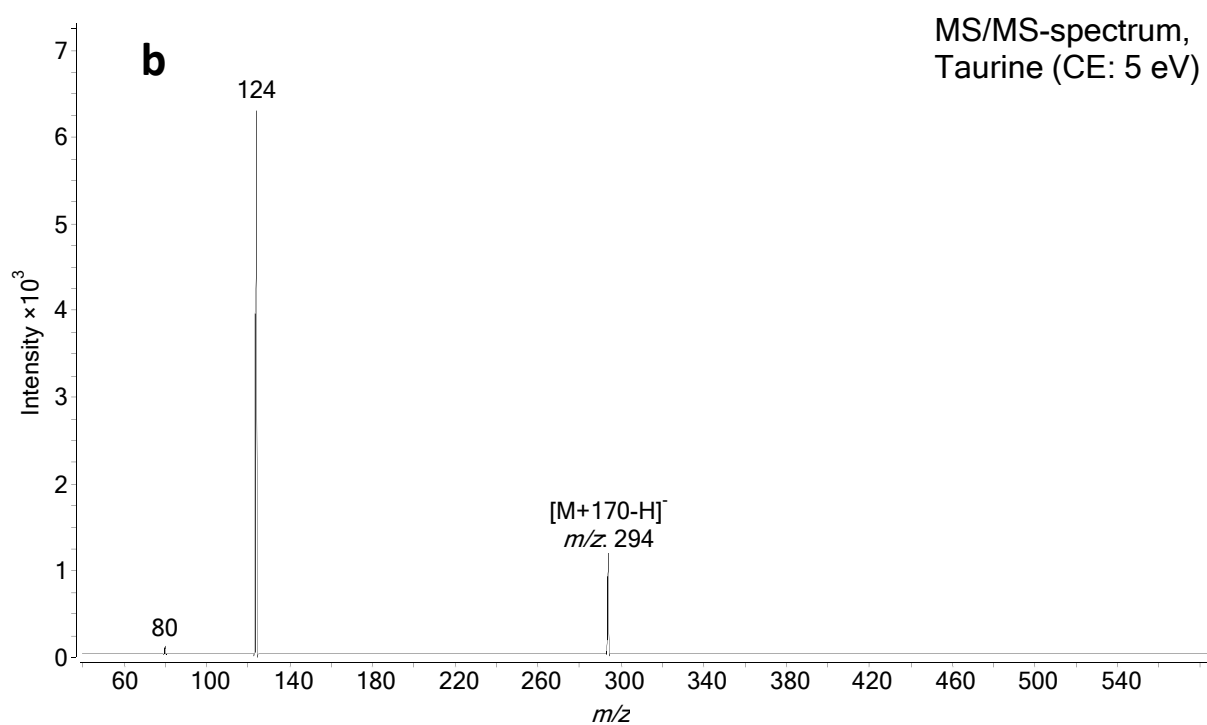

**Figure S6. a) MS-spectrum and b) MS/MS-spectrum of Azelaic Acid.**

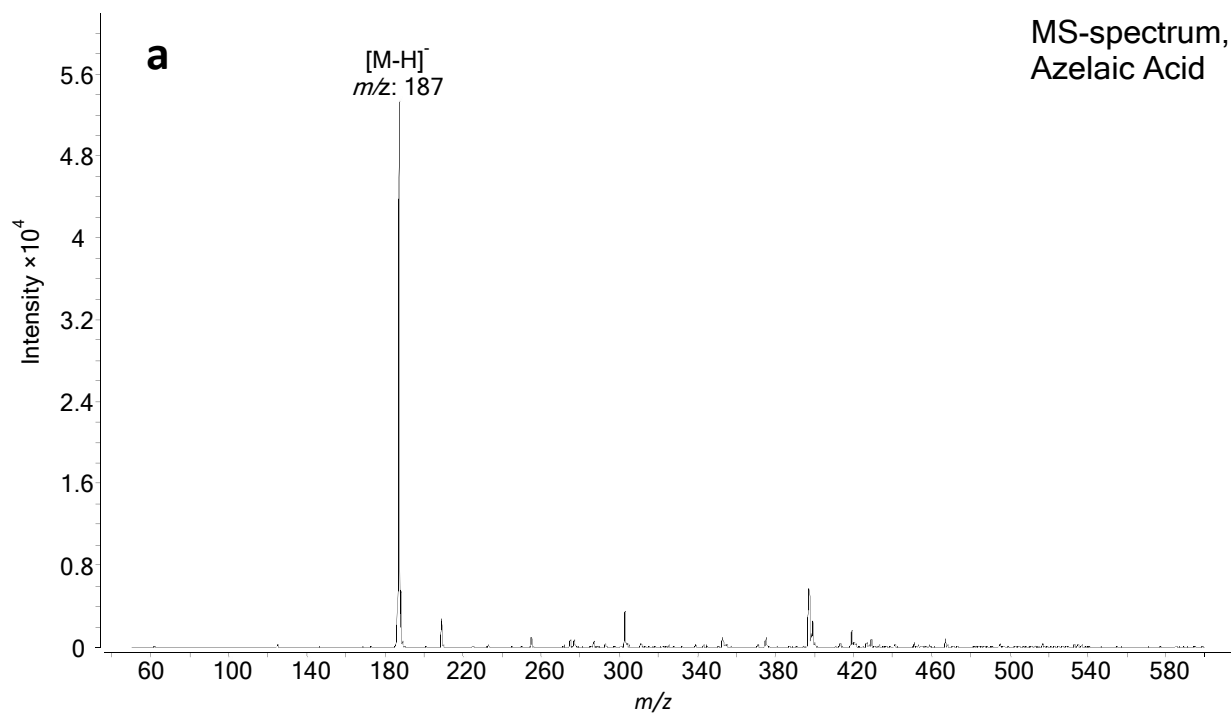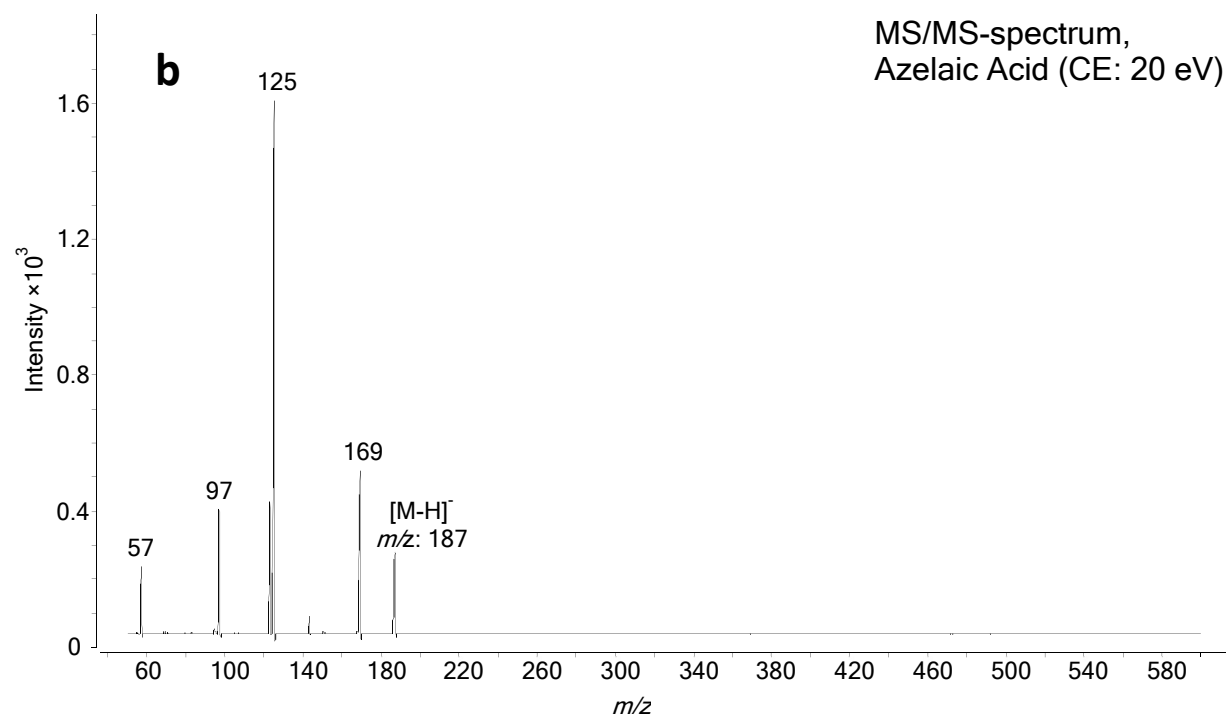

**Figure S7. a) MS-spectrum and b) MS/MS-spectrum of Gamma-butyrobetaine.**

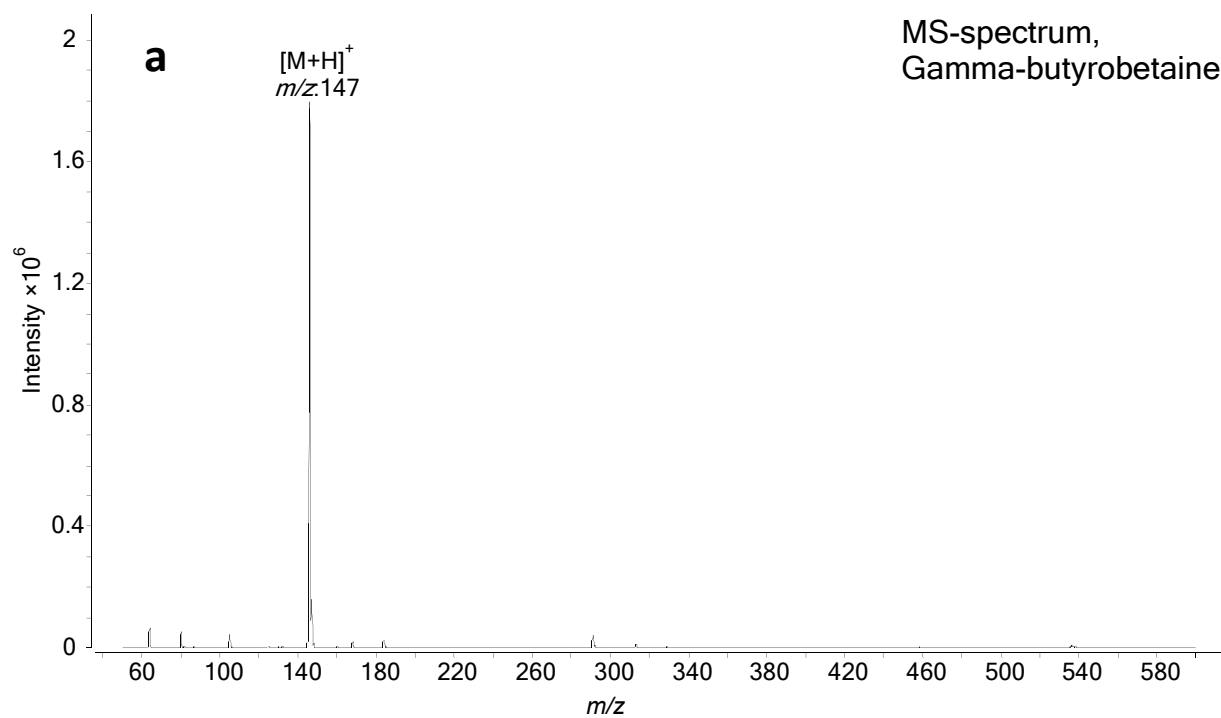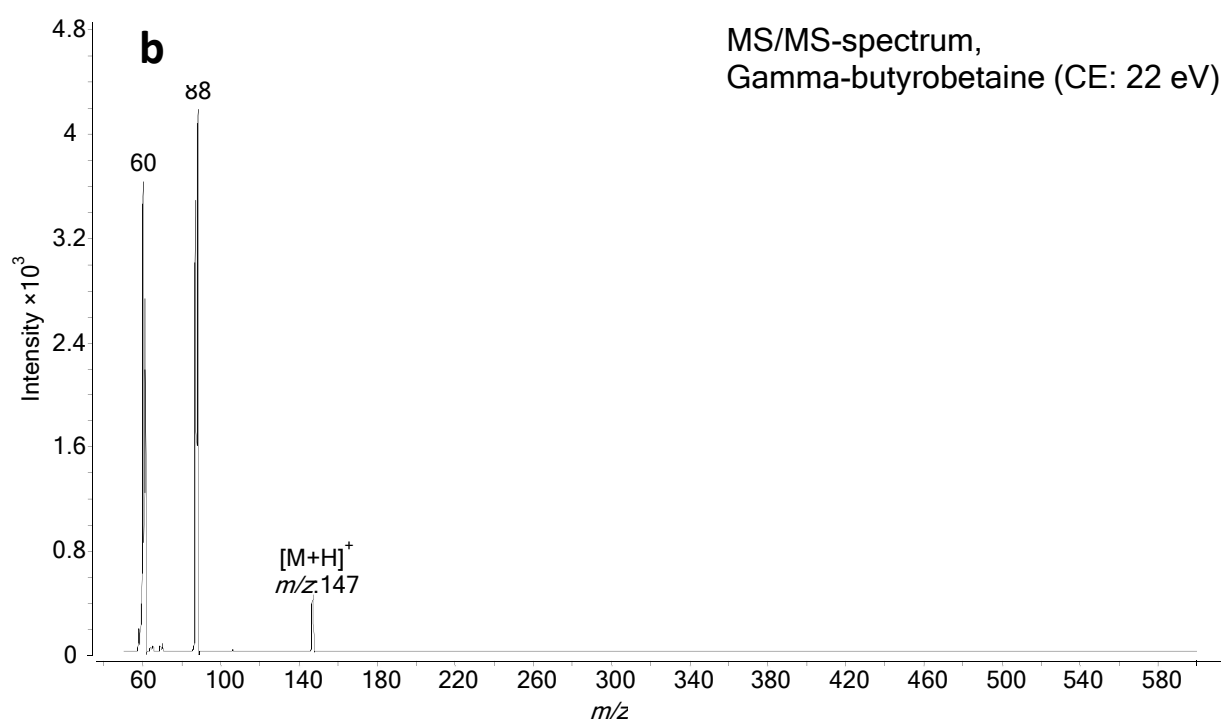



**Figure S8. a) MS-spectrum and b) MS/MS-spectrum of Glycolic Acid.**

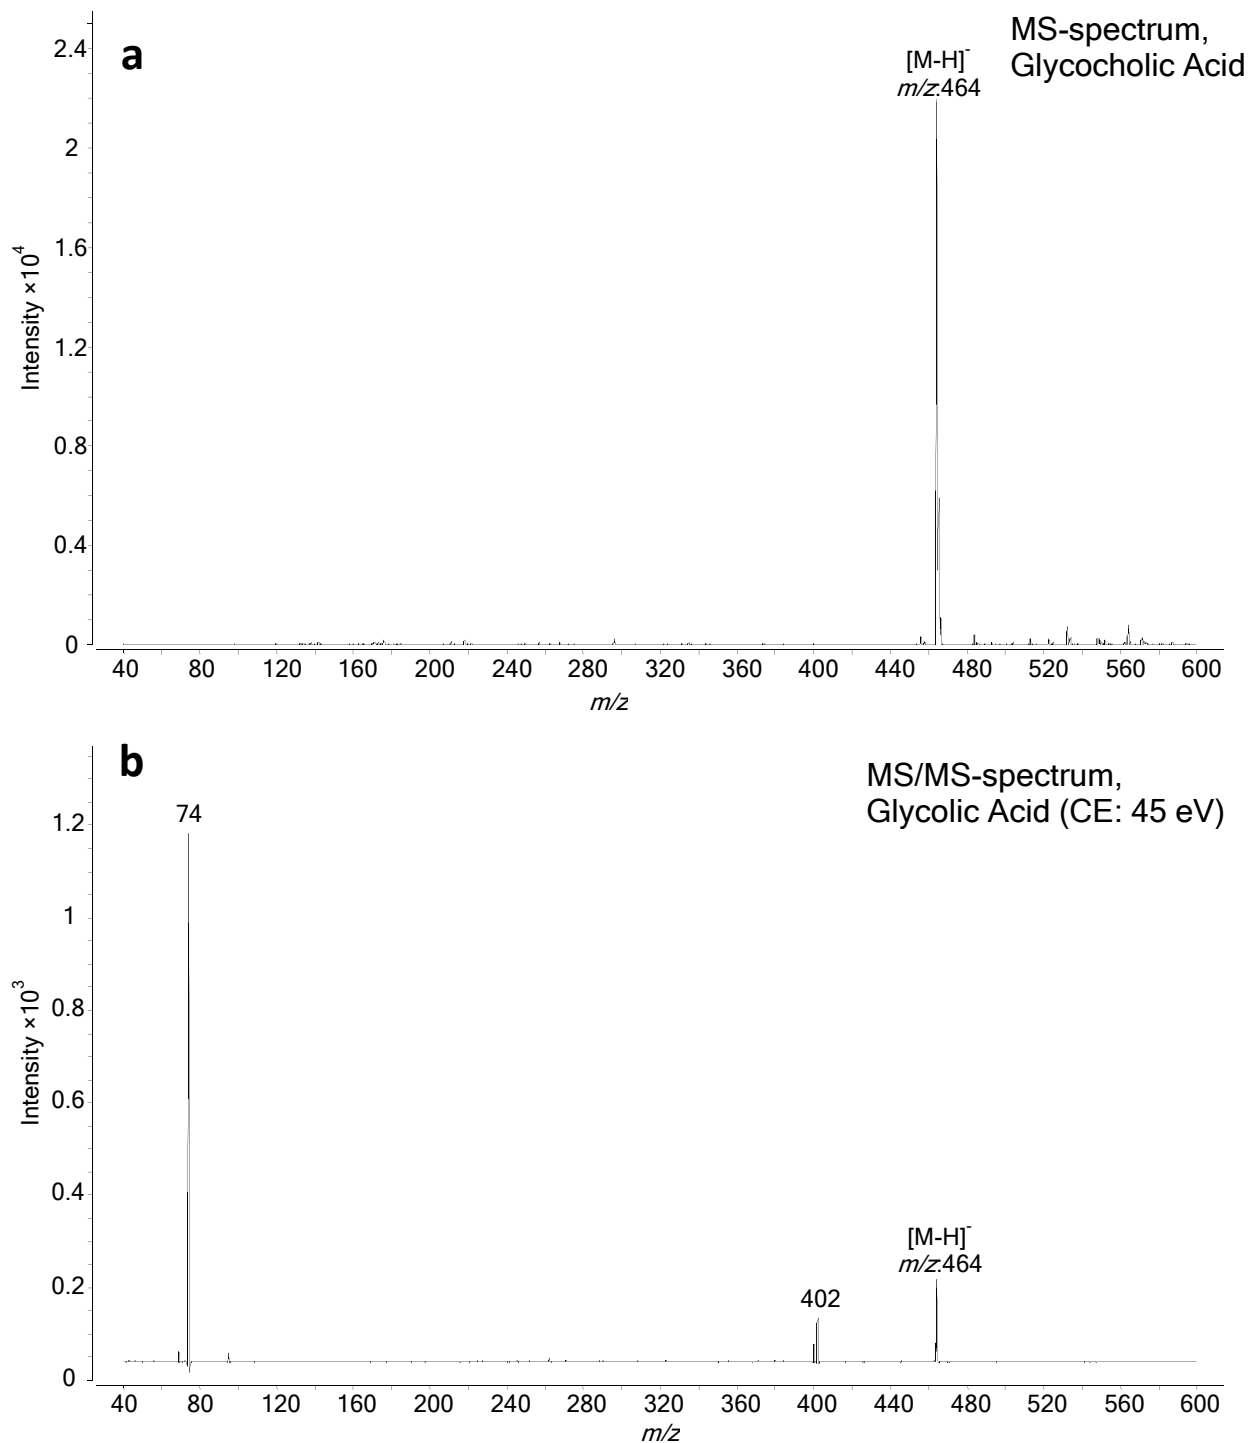

**Figure S9. a) MS-spectrum and b) MS/MS-spectrum of L-Homocitrulline.**

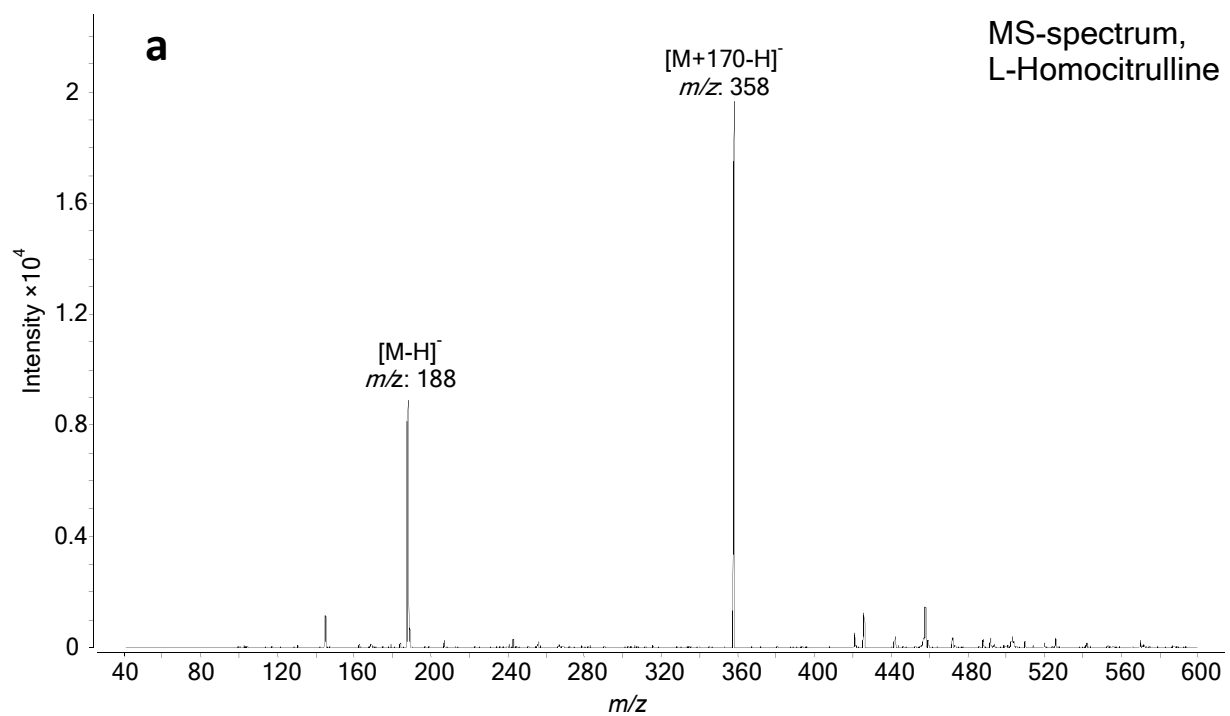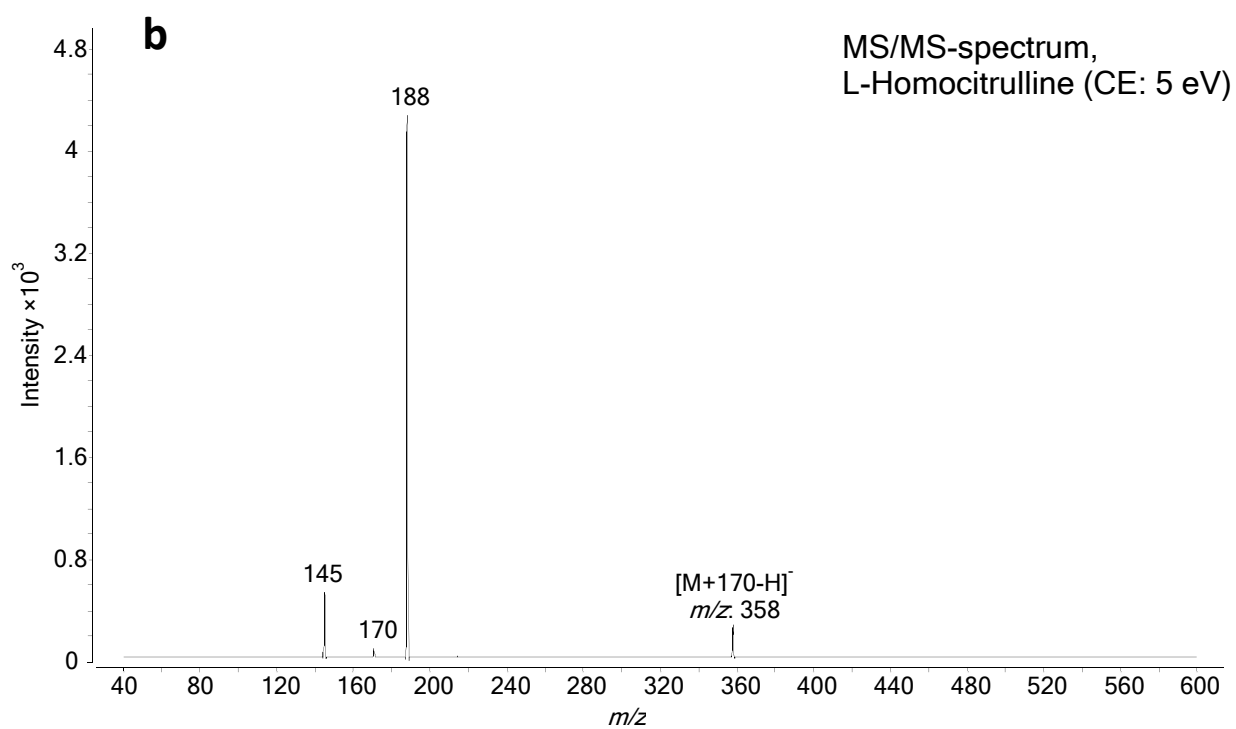

## References

1. MacLean B, Tomazela DM, Shulman N, Chambers M, Finney GL, Frewen B, et al. Skyline: An open source document editor for creating and analyzing targeted proteomics experiments. *Bioinformatics* (Oxford, England) 2010;26:966-8.
2. Team RC. R: A language and environment for statistical computing, r foundation for statistical computing. Vienna, Austria 2017.
